# Supplementary material for: Acetone: a solvent or a reagent depending on the addition order in SET-LRP
Source: Royal Society of Chemistry journal article supplement (doi:10.1039/c8py01331d), 2018-01-01
Supplement: c8py01331d1.pdf [file c8py01331d1.pdf]

# Acetone: solvent or reagent depending on the order of addition in SET-LRP

Adrian Moreno<sup>a,b</sup>, Jānis Lejnieks<sup>a</sup>, Marina Galià<sup>b</sup>, Gerard Lligadas<sup>a,b</sup>

and Virgil Percec<sup>\*a</sup>

<sup>a</sup> Roy & Diana Vagelos Laboratories, Department of Chemistry, University of Pennsylvania,  
Philadelphia, Pennsylvania 19104-6323, United States

<sup>b</sup> Laboratory of Sustainable Polymers, Department of Analytical Chemistry and Organic  
Chemistry, University Rovira i Virgili, Tarragona, Spain

\*Corresponding author: Virgil Percec, e-mail: percec@sas.upenn.edu

## Experimental

### Materials

Acetone (98%) grade synthesis was purchased from Scharlab and distilled over CaH<sub>2</sub>. Cu(II)Br<sub>2</sub> (99% Aldrich), tris(2-aminoethyl)amine (TREN, 98%, Aldrich), hexamethylated tris(2-aminoethyl)amine (Me<sub>6</sub>-TREN, 97%, Aldrich) and CDCl<sub>3</sub> (eurisotop, 99.9%) were used as received. Deuterated acetone (eurisotop, 99%) was freshly distilled over CaH<sub>2</sub> before use.

### Techniques

400 Mhz <sup>1</sup>H-NMR and D-NMR were recorded in a Varian VNMRS400 instrument at 25 °C. Samples were dissolved in 0.6 mL of CDCl<sub>3</sub> and CHCl<sub>3</sub> respectively, containing tetramethylsilane (TMS) as internal standard. For the Cu(II)Br<sub>2</sub>-

mediated bromination quantification experiment, the delay time (D1) was set at 10 s and the number of scans (nt) was set a minimum of 150 scans.

**Typical procedure for the Cu(II)Br<sub>2</sub>-mediated bromination of acetone.**

CuBr<sub>2</sub> (63.0 mg, 0.282 mmol) was placed in a dry vial (dried in an oven O.N.) containing a magnetic stir bar and deoxygenized by purging with N<sub>2</sub> for 10 min at 25 °C. In another vial acetone (2 mL) was deoxygenized by bubbling with N<sub>2</sub> for 30 min at 0 °C. Then, the deoxygenized acetone was transferred via a syringe and added to CuBr<sub>2</sub> (under N<sub>2</sub>) and the reaction was stirred. Samples were withdrawn periodically from the reaction mixture, the excess of acetone was removed by evaporating with N<sub>2</sub> flow during 5 seconds. The obtained residue was dissolved in CDCl<sub>3</sub> and <sup>1</sup>H-NMR and were recorded immediately. The ratio of the products was determined using bromoacetone as a reference.

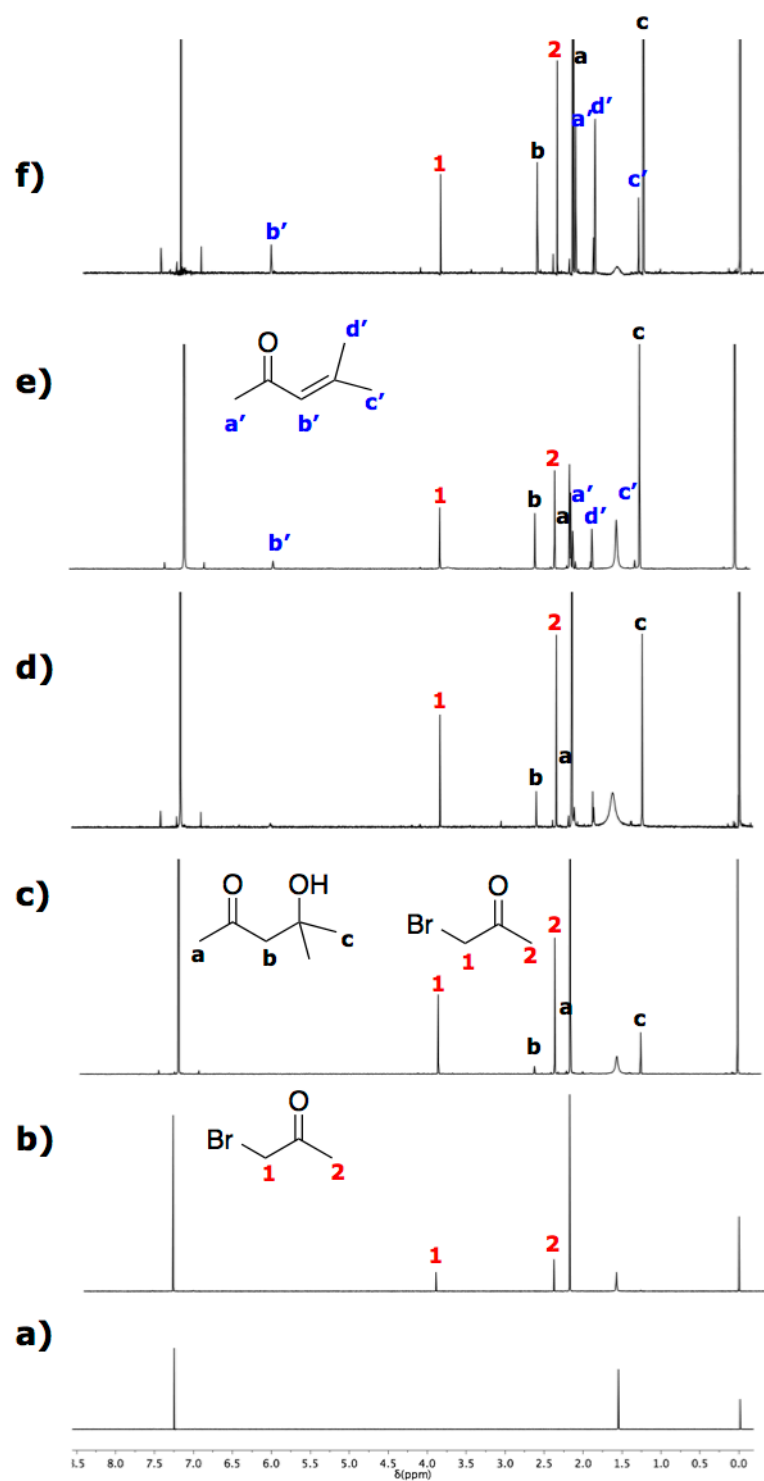

**Figure S1.**  $^1\text{H-NMR}$  traces of  $\text{Cu(II)Br}_2$ -mediated bromination of freshly distilled acetone (**a**) after 5 minutes, (**b**) after 10 minutes, (**c**) after 15 minutes, (**d**) after 30 hours, (**e**) after 4h and (**f**) after 17h in  $\text{CDCl}_3$ .
